# Supplementary material for: Directed differentiation of human iPSC into insulin producing cells is improved by induced expression of PDX1 and NKX6.1 factors in IPC progenitors
Source: PubMed Central journal article supplement (PMC5168869; doi:10.1186/s12967-016-1097-0), 2016-12-20
Supplement: 12967_2016_1097_MOESM1_ESM.pdf [file 12967_2016_1097_MOESM1_ESM.pdf]

**Table S1.** List of primers used for cloning and sequencing.

| <b>Primer</b>          | <b>Sequence (5'→3')</b>                                                               |
|------------------------|---------------------------------------------------------------------------------------|
| <b>FP attB1</b>        | GGG GAC AAG TTT GTA CAA AAA AGC AGC GTA TGG TGA<br>GCA AGG GCG AGG A                  |
| <b>FP attB2</b>        | GGG GAC CAC TTT GTA CAA GAA AGC TGG GTC TTG TAC<br>AGC TCG TCC ATG CCG                |
| <b>Gateway 1</b>       | CAC ATT ATA CGA GCC GGA AGC AT                                                        |
| <b>Gateway 2</b>       | CAG TGT GCC GGT CTC CGT TAT CG                                                        |
| <b>M13 Fwd (-20)</b>   | GTA AAA CGA CGG CCA G                                                                 |
| <b>M13 Rev</b>         | CAG GAA ACA GCT ATG AC                                                                |
| <b>Nkx6.1 attB1</b>    | GGG GAC AAG TTT GTA CAA AAA AGC AGG CTA CCA TGG<br>AGG GCA CCC GGC AGA GCG CAT TCC TG |
| <b>Nkx6.1 attB2</b>    | GGG GAC CAC TTT GTA CAA GAA AGC TGG GTT TCA GGA<br>TGA GCT CTC CGG CTC GGA CGC GTG C  |
| <b>Pdx1-VP16 attB1</b> | GGG GAC AAG TTT GTA CAA AAA AGC AGC GTA TGA ACG<br>GCG AGG AGC AGT ACT ACG CG         |
| <b>Pdx1-VP16 attB2</b> | GGG GAC CAC TTT GTA CAA GAA AGC TGG GTT CGT GGT<br>TCC TGC GGC CG                     |
| <b>pLVX-TRE3G Fwd</b>  | CAG ATC GCC TGG AGC AAT TC                                                            |
| <b>pLVX-TRE3G Rev</b>  | GCT CCA GAC TGC CTT GGG AA                                                            |
