# Supplementary material for: Directed differentiation of human iPSC into insulin producing cells is improved by induced expression of PDX1 and NKX6.1 factors in IPC progenitors
Source: PubMed Central journal article supplement (PMC5168869; doi:10.1186/s12967-016-1097-0), 2016-12-20
Supplement: 12967_2016_1097_MOESM2_ESM.pdf [file 12967_2016_1097_MOESM2_ESM.pdf]

**Table S2.** Antibodies used for immunocytochemical analysis

| <b>Target</b>                                | <b>Host</b> | <b>Manufacturer</b>      | <b>Catalogue number</b> | <b>Working dilution</b> |
|----------------------------------------------|-------------|--------------------------|-------------------------|-------------------------|
| <b>C-Peptide</b>                             | rabbit      | Cell Signalling          | 4593S                   | 1:100                   |
| <b>CXCR4</b>                                 | mouse       | Santa Cruz Biotechnology | sc-12764                | 1:200                   |
| <b>E-cadherin</b>                            | rabbit      | Santa Cruz Biotechnology | sc- 7870                | 1:200                   |
| <b>Insulin</b>                               | rabbit      | Cell Signalling          | 4590S                   | 1:100                   |
| <b>Mouse IgG,</b><br>(Alexa 594 conjugated)  | donkey      | Life Technologies        | A21203                  | 1:500                   |
| <b>NKX6.1</b>                                | rabbit      | Abcam                    | ab90706                 | 1:200                   |
| <b>PDX1</b>                                  | rabbit      | Abcam                    | ab47267                 | 1:200                   |
| <b>Rabbit IgG,</b><br>(Alexa 488 conjugated) | donkey      | Life Technologies        | A21206                  | 1:500                   |
| <b>SOX17</b>                                 | rabbit      | Millipore                | 09-038                  | 1:100                   |
| <b>MafA</b>                                  | rabbit      | Pierce                   | PA5-26450               | 1:100                   |
| <b>Pax6</b>                                  | rabbit      | Abcam                    | ab5790                  | 1:100                   |
| <b>SLC30A8</b>                               | rabbit      | Sigma-Aldrich            | SAB3500538              | 1:100                   |
| <b>Tyrosine hydroxylase</b>                  | mouse       | Santa Cruz Biotechnology | sc-25269                | 1:250                   |
| <b>Somatostatin</b>                          | rabbit      | Santa Cruz Biotechnology | sc-13099                | 1:200                   |
