# Supplementary material for: Directed differentiation of human iPSC into insulin producing cells is improved by induced expression of PDX1 and NKX6.1 factors in IPC progenitors
Source: PubMed Central journal article supplement (PMC5168869; doi:10.1186/s12967-016-1097-0), 2016-12-20
Supplement: 12967_2016_1097_MOESM3_ESM.pdf [file 12967_2016_1097_MOESM3_ESM.pdf]

**Table S3.** List of primers used for quantitative real-time PCR reactions.

| <b>Primer</b>       | <b>Sequence (5'→3')</b>            | <b>Amplicon size (bp)</b> |
|---------------------|------------------------------------|---------------------------|
| <b>18S rRNA Fwd</b> | GTA ACC CGT TGA ACC CCA TT         | 151                       |
| <b>18S rRNA Rev</b> | CCA TCC AAT CGG TAG TAG CG         |                           |
| <b>CXCR4 Fwd</b>    | TCT ACA GCA GTG TCC TCA TCC TGG CC | 150                       |
| <b>CXCR4 Rev</b>    | GAA TAG TCA GCA GGA GGG CAG GGA T  |                           |
| <b>FOXA2 Fwd</b>    | CGA GTT GAG CCT GTG AGG CCT GG     | 150                       |
| <b>FOXA2 Rev</b>    | ACT CGG GCA ACA TGT TCG AGA ACG G  |                           |
| <b>SOX17 Fwd</b>    | ACC TAC AGC TAC GCG CAG GTC TCG    | 151                       |
| <b>SOX17 Rev</b>    | TCG CGC CGT AGT ACA CGT GAA GGG    |                           |
