# Supplementary material for: Directed differentiation of human iPSC into insulin producing cells is improved by induced expression of PDX1 and NKX6.1 factors in IPC progenitors
Source: PubMed Central journal article supplement (PMC5168869; doi:10.1186/s12967-016-1097-0), 2016-12-20
Supplement: 12967_2016_1097_MOESM4_ESM.pdf [file 12967_2016_1097_MOESM4_ESM.pdf]

**Table S4.** Composition of media used for culture of renal epithelial cells.

|             |                                                                                                                                                                                                                                                                                                                          |
|-------------|--------------------------------------------------------------------------------------------------------------------------------------------------------------------------------------------------------------------------------------------------------------------------------------------------------------------------|
| <b>Ep#1</b> | DMEM, human recombinant Insulin 10 µg/mL, human recombinant Transferrin 10 µg/mL, sodium selenite 20 nM                                                                                                                                                                                                                  |
| <b>Ep#2</b> | DMEM, human recombinant Albumin 1 mg/mL, human recombinant Insulin 10 µg/mL, human recombinant Transferrin 10 µg/mL, sodium selenite 20 nM                                                                                                                                                                               |
| <b>Ep#3</b> | REBM Basal Medium (Lonza), REGM SingleQuot Kit (Lonza)                                                                                                                                                                                                                                                                   |
| <b>Ep#4</b> | DMEM, human recombinant Albumin 1 mg/mL, EGF 10 ng/mL, epinephrine 0.5 µg/mL, hydrocortisone 36 ng/mL, triiodo-L-thyronine 4 pg/mL, human recombinant Insulin 10 µg/mL, human recombinant Transferrin 10 µg/mL, sodium selenite 20 nM, chemically defined lipid concentrate 1:50 dilution                                |
| <b>Ep#5</b> | DMEM, human recombinant Albumin 1 mg/mL, EGF 10 ng/mL, Fgf2 5 ng/mL, PDGF-AB 5 ng/mL, epinephrine 0.5 µg/mL, hydrocortisone 36 ng/mL, triiodo-L-thyronine 4 pg/mL, human recombinant Insulin 10 µg/mL, human recombinant Transferrin 10 µg/mL, sodium selenite 20 nM, chemically defined lipid concentrate 1:50 dilution |
| <b>Ep#6</b> | DMEM, Foetal Bovine Serum 10%                                                                                                                                                                                                                                                                                            |
