# Supplementary material for: Directed differentiation of human iPSC into insulin producing cells is improved by induced expression of PDX1 and NKX6.1 factors in IPC progenitors
Source: PubMed Central journal article supplement (PMC5168869; doi:10.1186/s12967-016-1097-0), 2016-12-20
Supplement: 12967_2016_1097_MOESM5_ESM.pdf [file 12967_2016_1097_MOESM5_ESM.pdf]

**Table S5.** Composition of media used for culture of renal epithelial cells.

|            |                                                                                                                                                                                                                                                                      |
|------------|----------------------------------------------------------------------------------------------------------------------------------------------------------------------------------------------------------------------------------------------------------------------|
| <b>F#1</b> | DMEM, human recombinant Insulin 10 µg/mL, human recombinant Transferrin 10 µg/mL, sodium selenite 20 nM                                                                                                                                                              |
| <b>F#2</b> | DMEM, human recombinant Albumin 1 mg/mL, human recombinant Insulin 10 µg/mL, human recombinant Transferrin 10 µg/mL, sodium selenite 20 nM                                                                                                                           |
| <b>F#3</b> | DMEM, human recombinant Albumin 1 mg/mL, EGF 10 ng/mL, Fgf2 5 ng/mL, PDGF-AB 5 ng/mL, hydrocortisone 36 ng/mL, human recombinant Insulin 10 µg/mL, human recombinant Transferrin 10 µg/mL, sodium selenite 20 nM, chemically defined lipid concentrate 1:50 dilution |
| <b>F#4</b> | DMEM, Foetal Bovine Serum 10%                                                                                                                                                                                                                                        |
