# Supplementary material for: Directed differentiation of human iPSC into insulin producing cells is improved by induced expression of PDX1 and NKX6.1 factors in IPC progenitors
Source: PubMed Central journal article supplement (PMC5168869; doi:10.1186/s12967-016-1097-0), 2016-12-20
Supplement: 12967_2016_1097_MOESM6_ESM.pdf [file 12967_2016_1097_MOESM6_ESM.pdf]

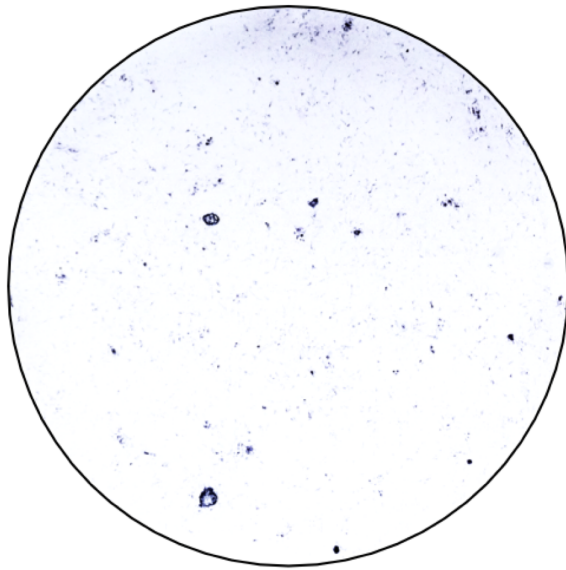

**iPSC generated  
from fibroblasts**

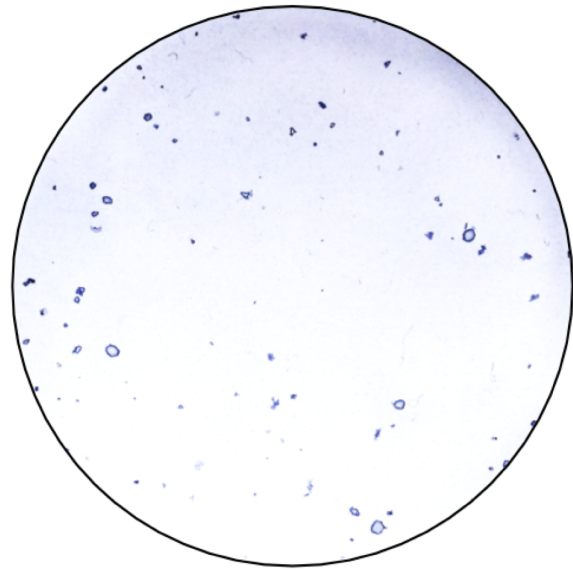

**iPSC generated from  
epithelial cells**

**Figure S1. Derivation of iPSC cells in defined culture conditions**

Alkaline phosphatase stainings of iPSC cells generated from HFF-1 fibroblasts and urinary epithelial cells. Somatic cells were seeded on cell culture vessels coated with Laminin-511 (fibroblasts) or Collagen I (for epithelial cells), and transfected with reprogramming episomal vectors with use of L64-PEI reagent.
