# Supplementary material for: Directed differentiation of human iPSC into insulin producing cells is improved by induced expression of PDX1 and NKX6.1 factors in IPC progenitors
Source: PubMed Central journal article supplement (PMC5168869; doi:10.1186/s12967-016-1097-0), 2016-12-20
Supplement: 12967_2016_1097_MOESM7_ESM.pdf [file 12967_2016_1097_MOESM7_ESM.pdf]

**Table S6.** Composition of media used for derivation of the Definitive Endoderm from iPS cells.

|            |                                                                                                                                                                                                        |
|------------|--------------------------------------------------------------------------------------------------------------------------------------------------------------------------------------------------------|
| <b>DE1</b> | RPMI-1640, Foetal Bovine Serum 2%                                                                                                                                                                      |
| <b>DE2</b> | RPMI-1640, Human Serum 2%                                                                                                                                                                              |
| <b>DE3</b> | RPMI-1640, human recombinant Albumin 1 mg/mL, human recombinant Insulin 10 µg/mL, human recombinant Transferrin 10 µg/mL, sodium selenite 20nM                                                         |
| <b>DE4</b> | RPMI-1640, human recombinant Albumin 1 mg/mL, human recombinant Insulin 10 µg/mL, human recombinant Transferrin 10 µg/mL, chemically defined lipid concentrate 1:50 dilution, ascorbic acid 12.5 µg/mL |
