# Supplementary material for: Directed differentiation of human iPSC into insulin producing cells is improved by induced expression of PDX1 and NKX6.1 factors in IPC progenitors
Source: PubMed Central journal article supplement (PMC5168869; doi:10.1186/s12967-016-1097-0), 2016-12-20
Supplement: 12967_2016_1097_MOESM8_ESM.pdf [file 12967_2016_1097_MOESM8_ESM.pdf]

**Table S7.** Comparison of relative SOX17, FOXA2 and CXCR4 expression levels in Definitive Endoderm cells by means of quantitative RT-PCR

| Sample                                 | Mean C <sub>v</sub> values |        |        |          | PCR Efficiencies |       |       |          | Target gene expression relative to iPS cells |        |          | Mean Relative expression |               |              |               |     |        |       |        |
|----------------------------------------|----------------------------|--------|--------|----------|------------------|-------|-------|----------|----------------------------------------------|--------|----------|--------------------------|---------------|--------------|---------------|-----|--------|-------|--------|
|                                        | SOX17                      | FOXA2  | CXCR4  | 18S rRNA | SOX17            | FOXA2 | CXCR4 | 18S rRNA | SOX17                                        | FOXA2  | CXCR4    | SOX17                    | FOXA2         | CXCR4        |               |     |        |       |        |
| Undifferentiated iPS cells             | 34,590                     | 32,081 | 30,437 | 15,336   | 1,781            | 1,763 | 1,795 | 1,717    | 0,515                                        | 1,034  | 0,481    |                          |               |              |               |     |        |       |        |
|                                        | 34,473                     | 31,181 | 30,669 | 15,277   | 1,761            | 1,770 | 1,793 | 1,733    | 0,534                                        | 1,701  | 0,403    |                          |               |              |               |     |        |       |        |
|                                        | 32,410                     | 32,464 | 27,803 | 15,273   | 1,863            | 1,811 | 1,861 | 1,809    | 1,849                                        | 0,793  | 2,340    |                          |               |              |               |     |        |       |        |
|                                        | 32,154                     | 32,479 | 27,748 | 15,118   | 1,846            | 1,821 | 1,867 | 1,824    | 1,968                                        | 0,717  | 2,207    |                          |               |              |               |     |        |       |        |
| iPS cells differentiated in DE1 medium | 32,681                     | 35,624 | 33,942 | 22,701   | 1,823            | 1,798 | 1,844 | 1,811    | 131,590                                      | 10,203 | 4,493    | Average                  | <b>160,35</b> | <b>37,00</b> | <b>473,54</b> |     |        |       |        |
|                                        | 33,297                     | 37,059 | 33,580 | 22,614   | 1,788            | 1,813 | 1,854 | 1,825    | 86,155                                       | 4,140  | 5,331    |                          |               |              |               | SD  | 143,28 | 31,83 | 719,27 |
|                                        | 35,359                     | 33,398 | 32,851 | 23,466   | 1,843            | 1,854 | 1,863 | 1,819    | 41,204                                       | 60,301 | 13,869   |                          |               |              |               | SEM | 58,50  | 13,00 | 293,64 |
|                                        | 36,088                     | 36,427 | 32,996 | 23,563   | 1,839            | 1,857 | 1,840 | 1,811    | 28,113                                       | 10,603 | 13,441   |                          |               |              |               |     |        |       |        |
|                                        | 31,356                     | 32,637 | 24,667 | 22,779   | 1,854            | 1,817 | 1,872 | 1,815    | 307,027                                      | 62,835 | 1413,940 |                          |               |              |               |     |        |       |        |
|                                        | 31,101                     | 32,410 | 24,739 | 22,825   | 1,844            | 1,815 | 1,857 | 1,835    | 368,011                                      | 73,897 | 1390,174 |                          |               |              |               |     |        |       |        |
| iPS cells differentiated in DE2 medium | 30,929                     | 36,277 | 33,832 | 16,905   | 1,849            | 1,804 | 1,837 | 1,895    | 11,972                                       | 0,219  | 0,152    | Average                  | <b>120,81</b> | <b>35,42</b> | <b>27,26</b>  |     |        |       |        |
|                                        | 32,633                     | 34,254 | 33,787 | 16,960   | 1,855            | 1,792 | 1,856 | 1,828    | 4,419                                        | 0,750  | 0,161    |                          |               |              |               | SD  | 132,25 | 40,42 | 31,33  |
|                                        | 24,353                     | 24,700 | 22,477 | 15,000   | 1,841            | 1,803 | 1,851 | 1,829    | 204,187                                      | 67,321 | 52,651   |                          |               |              |               | SEM | 66,12  | 20,21 | 15,67  |
|                                        | 24,060                     | 24,681 | 22,496 | 15,126   | 1,836            | 1,826 | 1,843 | 1,827    | 262,662                                      | 73,387 | 56,095   |                          |               |              |               |     |        |       |        |
| iPS cells differentiated in DE3 medium | 29,741                     | 35,888 | 33,158 | 21,066   | 1,823            | 1,792 | 1,864 | 1,789    | 293,192                                      | 3,292  | 2,745    | Average                  | <b>121,20</b> | <b>21,02</b> | <b>89,75</b>  |     |        |       |        |
|                                        | 30,550                     | 34,996 | 33,093 | 21,001   | 1,836            | 1,751 | 1,857 | 1,809    | 172,972                                      | 5,375  | 2,748    |                          |               |              |               | SD  | 95,81  | 25,63 | 130,33 |
|                                        | 33,596                     | 32,031 | 32,282 | 21,877   | 1,806            | 1,808 | 1,830 | 1,817    | 46,349                                       | 52,588 | 7,635    |                          |               |              |               | SEM | 39,11  | 10,46 | 53,21  |
|                                        | 33,172                     | 31,798 | 31,775 | 21,737   | 1,816            | 1,790 | 1,859 | 1,821    | 55,080                                       | 55,546 | 9,591    |                          |               |              |               |     |        |       |        |
|                                        | 28,437                     | 31,383 | 22,103 | 17,320   | 1,849            | 1,810 | 1,834 | 1,819    | 69,067                                       | 5,100  | 264,183  |                          |               |              |               |     |        |       |        |
|                                        | 27,921                     | 31,641 | 22,116 | 17,251   | 1,870            | 1,797 | 1,874 | 1,819    | 90,533                                       | 4,203  | 251,603  |                          |               |              |               |     |        |       |        |
| iPS cells differentiated in DE4 medium | 31,640                     | 35,329 | 33,393 | 22,614   | 1,826            | 1,794 | 1,859 | 1,816    | 234,407                                      | 11,548 | 5,982    | Average                  | <b>167,12</b> | <b>32,24</b> | <b>615,64</b> |     |        |       |        |
|                                        | 34,034                     | 36,836 | 34,756 | 22,844   | 1,853            | 1,812 | 1,847 | 1,810    | 63,300                                       | 5,416  | 2,965    |                          |               |              |               | SD  | 140,61 | 20,64 | 943,03 |
|                                        | 35,836                     | 34,847 | 33,055 | 23,719   | 1,827            | 1,854 | 1,838 | 1,816    | 35,917                                       | 29,690 | 14,221   |                          |               |              |               | SEM | 57,41  | 8,42  | 384,99 |
|                                        | 35,324                     | 34,098 | 33,754 | 23,602   | 1,847            | 1,872 | 1,848 | 1,817    | 45,633                                       | 43,173 | 8,632    |                          |               |              |               |     |        |       |        |
|                                        | 31,289                     | 32,725 | 23,873 | 22,312   | 1,851            | 1,815 | 1,858 | 1,804    | 241,926                                      | 45,152 | 1744,474 |                          |               |              |               |     |        |       |        |
|                                        | 30,653                     | 32,409 | 23,835 | 22,431   | 1,860            | 1,814 | 1,868 | 1,793    | 381,562                                      | 58,482 | 1917,575 |                          |               |              |               |     |        |       |        |
